1 **Daily Salt Intake, its Discretionary Use and Validation of Methods for Estimation using**  
2 **Spot Urine – Findings from Islamabad, Pakistan**

3 Muhammad Arif Nadeem Saqib, PhD<sup>1,2</sup>, Ibrar Rafique, M.Phil<sup>1</sup>, Muhammad Ansar, PhD<sup>3</sup>  
4 Tayyaba Rahat, M.Phil<sup>1</sup>

5 <sup>1</sup> Senior Research Officer, Pakistan Health Research Council, Shahrah-e-Jamhuriat, Constitution  
6 Avenue, G-5/2, Islamabad. Ph.No. 0092-51-9207368, Email. [arif289@gmail.com](mailto:arif289@gmail.com)

7 <sup>2</sup> Adjunct Associate Professor, University of Management Technology, Lahore

8 <sup>1</sup> Research Officer, Pakistan Health Research Council, Shahrah-e-Jamhuriat, Constitution  
9 Avenue, G-5/2, Islamabad. Ph.No. 0092-51-9224327, Email. [ibrarpmrc@gmail.com](mailto:ibrarpmrc@gmail.com)

10 <sup>3</sup> Professor, Department of Biochemistry, Faculty of Biological Sciences, Quaid-I-Azam  
11 University, 45320, Islamabad, Pakistan Email address [ansar@qau.edu.pk](mailto:ansar@qau.edu.pk)

12 <sup>1</sup> Statistical Officer, Pakistan Health Research Council, Shahrah-e-Jamhuriat, Constitution  
13 Avenue, G-5/2, Islamabad. Ph.No. 0092-51-9207386. Email address: [tayyabarahat@gmail.com](mailto:tayyabarahat@gmail.com)

14 **Authors Declaration:**

15 The MANS conceptualize and designed the study, secure the funding and revise the manuscript,  
16 IR drafted the project and manuscript, MA interpreted the data and revise the article with  
17 intellectual content, TR performed the statistical analysis and interpreted results.

18 **Funding Statement:**

19 This work was financially supported by the Pakistan Health Research Council  
20 [15/2016/RDC/Head Office]

21 **Conflict of interest:**

22 There is no conflict of interest to declare.

23 **Ethics Statement:**

1 Institutional Bioethics Committee of Pakistan Health Research Committee provided ethical  
2 clearance. The research work carried according to the Helsinki Declaration and all participants  
3 gave written informed consent for their participation.

4 **Corresponding author:**

5 Ibrar Rafique, Research Officer, Pakistan Health Research Council, Shahrah-e-Jamhuriat,  
6 Constitution Avenue, G-5/2, Islamabad. Ph.No. 0092-51-9224327, Email.  
7 [ibrarpmrc@gmail.com](mailto:ibrarpmrc@gmail.com)

8 **Abstract:**

9 **Background:** The study was designed to estimate daily salt intake, its discretionary use in  
10 healthy individuals and to validate three common methods for salt estimation in Pakistani  
11 population.

12 **Methods:**

13 Information on demography and discretionary salt use was collected healthy adults (>18 years)  
14 along with a blood sample, spot urine sample and 24 hours urine samples. Sodium, chloride,  
15 potassium levels and serum creatinine were measured using standard methods. For daily salt  
16 estimation, three common methods i.e. INTERSALT, Tanaka and Kawasaki were validated for  
17 their applicability in local settings.

18 **Results:**

19 Overall 24 h sodium excretion was 158 mmol/l indicating intake of 8.64 ( $\pm 4.43$ ) grams salt per  
20 day which was significantly associated with male gender (p. <0.004) and adding salt during  
21 cooking (p. <0.0001). Most (73%) of the participants know about hazardous effects of high salt  
22 intake, however, only 25% consider important to lower salt intake. Although, there is  
23 insignificant difference (p. 0.09) between measured and estimated 24 hour urine however none  
24 of three methods i.e. INTERSALT(bias: -19.64; CCC -0.79), Tanaka(bias: 167.35; CCC -0.37)  
25 and Kawasaki (bias: -42.49, CCC -0.79) showed any agreement between measured and estimated  
26 24 hour sodium.

27 **Conclusion:**

1 Daily intake of salt was high than recommended by the WHO. Findings showed that none of the  
2 three methods could be used for estimating daily intake of salt in local settings of Pakistan.

### 3 **Introduction:**

4 High intake of salt is associated with increased risk of hypertension, heart diseases and gastric  
5 cancer (1-3). In most of the countries, average daily salt intake ranges 9-12 g/day that is much  
6 higher than recommended i.e. <5g/day(4). It has been reported that non-communicable diseases  
7 (NCDs) burden could be decreased in the population by lowering salt intake(5). This will help in  
8 reducing the burden of NCDs globally with low cost. (6). Keeping in view the importance, the  
9 member states of WHO agreed to usefulness of reducing salt intake, the WHO member states  
10 have agreed for 30% decrease in sodium intake till 2025(7).

11 Estimation of daily salt is an important step to observe the level of sodium intake among general  
12 population which can provide the way forward to public health initiatives. intake (8). For daily  
13 salt estimation, the 24 hour urine collection is the standard method for salt estimation but is  
14 laborious and troublesome especially for healthy individuals(9). In order to overcome hurdles  
15 associated with 24hours urine collection, different mathematical equations have been formulated  
16 using spot urine which is being used as a appropriate. (10-15). Although spot test does not  
17 provide accurate prediction for 24hours sodium, however, this test can be used for population  
18 estimates and can provide adequate information for monitoring(13, 16).

19 Despite the rising burden of NCDs, especially hypertension and Cardiovascular diseases (CVDs)  
20 in Pakistan (17), information on the daily salt intake and its discretionary use was not available.  
21 Similarly, to our best knowledge, there was no report available addressing the issue of daily salt  
22 estimation in the local population. Therefore, this study was planned for estimation of daily salt  
23 intake we planned this study to estimate the daily salt intake in healthy individuals of Islamabad  
24 along with their discretionary usage. Besides this, it was also assessed whether these three  
25 methods are applicable for estimation using spot urine.

### 26 **Methods:**

27 This was a descriptive cross-sectional study conducted at Islamabad. Total of 120 healthy  
28 subjects aged more than 18 years were enrolled using non-probability convenient sampling.  
29 Those who had a history of hypertension or currently hypertensive, taking any medications,

1 difficulty in collecting urine and had pregnancy were excluded. It was assured that participants  
2 were healthy and were not suffering from fever, diarrhea or any other infections at the time of  
3 sample collection.

4 Information about demographics, discretionary salt use, awareness about the hazards of  
5 increased salt intake and their attitude for salt control was collected from the residents of  
6 Islamabad using a pre-designed questionnaire. Weight and height were measured as per standard  
7 protocol. The data was collected by a trained data collector who also briefed the participants  
8 about the process of sample collection. All testing was done at Excel Lab (Pvt) Ltd which is  
9 registered in the Programs for Excellence in Laboratory testing of the College of American  
10 Pathologists. The Excel Lab (Pvt) Ltd has sample collection points in the entire city of  
11 Islamabad.

12 After enrollment, data of each participant registered in Excel lab (Pvt) Ltd database along with  
13 detail of tests to be carried out which automatically generated a unique identification number  
14 along with barcodes for each test. These barcodes were placed spot and 24-hour urine collection  
15 containers and gel tube for a blood sample.

16 Two labeled collection containers (each separate for 24 hour urine and spot urine sample) were  
17 given to the participants. All participants were briefed about the process of collection of both  
18 spot and 24 h urine collection. They were asked to discard the first urine sample at 8.00 am on  
19 starting the day while including the first sample on the second day at 8.00 am.

20 The participants collected 24 hour urine samples as per convenience but preferably on the  
21 weekend. Majority of samples were collected on the weekend where the participants started their  
22 urine collection on Saturday morning till Sunday morning. The blood samples were collected  
23 during the urine collection for estimation of serum creatinine and electrolytes. The participants  
24 living in close vicinity of these collection points dropped their sample at their nearest point in the  
25 morning after completing 24 hour collection of urine. The participants provided second morning  
26 urine sample as a spot sample when coming to Laboratory . From these points, samples were  
27 immediately transported to main laboratory for testing.

28 Those participants, who lived far from collection points or reluctant to visit collection point, data  
29 collectors themselves visited their home in the early morning. They also provided second  
30 morning urine sample as a spot sample. This helped us to assure that second-morning sample

1 was taken as spot sample and was not part of 24 hour urine sample. The data collectors picked  
2 samples from their home and directly dropped at the main lab for analysis.

3 Each 24 hour sample was assessed for its completeness. Those samples having volume <0.5 mL  
4 and reported missed collection were discarded. Similarly samples collected outside the range of  
5 24±2h were also excluded. All samples were analyzed on the day of their collection. The  
6 potassium, sodium, and chloride were tested using electrode method while serum creatinine was  
7 done using the kinetic Jaffe reaction along with controls.

8 Institutional Bioethics Committee of [removed for blind peer review] provided ethical clearance.  
9 The research work carried according to the Declaration of Helsinki. The participants provided  
10 written informed consent prior to their participation.

### 11 **Statistical analysis:**

12 The data was entered in MS Excel and analyzed using SPSS 21 (SPSS & IBM, Inc, Chicago,  
13 Illinois, USA) for analysis. Tukey test (18) was used to check outliers at either side, categorized  
14 as 'outside' or 'far out' values. The outside and far out values were removed from data. Finally  
15 data of 106 participants was analyzed.

16 Gender wise difference between demographic characteristics and various analytes was  
17 determined using independent sample t-test while discretionary salt use and its association with  
18 risk factors was assessed by multivariate logistic regression.

19 The intake of salt on daily basis was calculated by the formula described elsewhere(14) while 24  
20 hour sodium in urine was estimated using and Tanaka (10) Kawasaki (15), INTERSALT  
21 (19)methods (Table 1). Paired t-test was applied to assess the difference between 24 hour  
22 measured and estimated salt intake. Correlation methods (concordance correlation co-efficient  
23 and intraclass consistency was used for determining the validity of three methods for estimating  
24 24 hour sodium by visualizing on scatter plot. Systematic bias between measured and estimated  
25 sodium was assessed by Bland and Altman plot. P- value (<0.05) was considered statistically  
26 significant.

### 27 **Results**

28 Out of 120 participants, 92 (77%) were male and 28 (23%) were females. The mean BMI (Body  
29 mass index) was 39 (±11.47) and mean age was 26.5 (±5.0) years. The mean volume of 24 h

1 urine was 1501 ( $\pm 884$ ) ml/day. Similarly, mean serum creatinine level was 0.88 ( $\pm 0.15$ ) mg/dl  
2 ranged between 0.5 to 1.2 mg/dl and 24-hour urine creatinine clearance was 107.9 ( $\pm 38.8$ )  
3 ml/min indicating normal kidney function. Mean levels of potassium, chloride, sodium, , and  
4 creatinine in spot and 24 hour urine are given in table 2. There was no significant difference  
5 between male and female for these analytes except sodium which was higher in females as  
6 compared to males ( $p < 0.002$ )

7 Mean 24 h sodium concentration was 158 mmol/l, which is almost equal to 8.64  $\pm$  4.43 g salt per  
8 day. There was a significant association between discretionary salt use with male gender ( $p$   
9  $< 0.004$ ) and adding salt during cooking ( $p < 0.0001$ ). However, there was no difference for age,  
10 BMI, adding salt on dining, took salty food from restaurant, and knowledge about the impact of  
11 high salt on health (Table 3).

12 A majority (71%) of the participants were using salt in their daily food while more than half  
13 were also adding extra salt at the dining table. When inquired from participants that how they  
14 categorized themselves regarding salt consumption, 91% believed it as per their need. Most  
15 (73%) of them were aware about the of the impact of extra use of salt on their health. Among  
16 all, 71% knew that it might cause hypertension and 11% associate this with bone diseases. Only  
17 few participants were aware that high level of salt might also cause gastric cancer and kidney  
18 stones. Twenty-five per cent of participants believed that reduction in daily salt intake is  
19 important for their health while others considered this either less important (57%) or gave no  
20 importance (17%).

21 Tanaka and Kawasaki equations showed significant difference between measured and estimated  
22 24 hour sodium. However, the difference between measured and estimated 24 h sodium using  
23 INTERSALT method was insignificant ( $p = 0.09$ ). Correlation analysis showed that none of three  
24 methods i.e. INTERSALT (bias: -19.64; CCC -0.79), Tanaka (bias: 167.35; CCC -0.37) and  
25 Kawasaki (bias: -42.49, CCC -0.79) showed agreement between estimated and measured 24 hour  
26 sodium. (Table 4 and Figure 1). Similarly, the Bland Altman plot also indicated an inconsistent  
27 pattern between estimated and measured 24 hour sodium (Figure 2).

28 **Discussion:**

1 In this study, mean salt intake was 8.4 grams per day and was significantly associated with male  
2 gender and adding extra salt during dining at the table. The WHO recommends that salt intake  
3 should be less 5 grams per day(20). High salt intake has been associated with different diseases  
4 including hypertension, gastric cancer, kidney stones and bone deformities(21). Similar studies  
5 from India, Bangladesh and China also reported high salt intake of 10.98, 17 and 11.8 grams per  
6 day, respectively(22-24). High daily salt intake is also common in developed countries like in  
7 Australia where the mean daily intake of salt was 8.8 grams/day(25).

8 In Southeast Asia, excess salt intake is part of culinary culture, which results in increased  
9 consumption of daily salt in this region (26). However, the habit of adding salt during dining is  
10 dangerous. Our study showed an association of discretionary salt use with male gender which is  
11 consistent with previous studies(27, 28). It was reported that high intake of salt in men might be  
12 due to high intake of food as compared to women (29). Another reason might be outside eating  
13 which more in men as compared to women in Pakistan.

14 Keeping in view the impact of high salt intake, the WHO members states agreed to reduce this  
15 by a relative of 30% by 2025(20). Many countries especially the developed ones have started  
16 different initiatives to reduce the daily salt intake. It has been shown that initiatives taken by the  
17 governments for the population-level reduction of salt intake were more useful (30). Pakistan is  
18 facing the dual burden of non-communicable and communicable diseases(31). It was reported  
19 that NCDs risk factors like tobacco, physical inactivity and unhealthy diet were common and  
20 there was a gradual increase in the burden of different NCDs especially diabetes, hypertension,  
21 and cardiovascular diseases (17, 32-35). The current findings of high daily salt intake is an  
22 addition to existing information on prevalence of different NCDs risk factors. Being the  
23 signatory of WHO treaty to lower the intake of salt in population, the Government of Pakistan  
24 must take urgent measures at policy level for reducing salt intake in the population. This will  
25 eventually help in reducing the burden of NCDs.

26 Estimating the salt intake (daily) is important to estimate the usage and monitor the impact of  
27 different interventions. The 24 hour urine is the standard method for estimating the intake of salt  
28 measuring the excretion of sodium in the urine. However, this is long and laborious and is  
29 impractical at population level. To overcome this issue, INTERSALT, Tanaka and Kawasaki



1 methods (10, 15, 19) were formulated on concentrations of spot urine potassium, sodium, and  
2 creatinine along with gender, height, weight, and age.

3 The INTERSALT equation was derived using data of spot urine sodium concentration and 24  
4 hour sodium excretion urine which was collected from 52 different populations belonging to 32  
5 countries (19). On the other hand, both Kawasaki and Tanaka methods were derived using data  
6 of Japanese population(10, 15). Different studies have validated these methods to estimate daily  
7 salt intake using spot urine but their utility varied from population to population (13, 14, 16, 36-  
8 38). Additionally, these methods are inadequate to measure the intake of salt (daily) salt intake  
9 using spot urine sample but still excellent option for estimating at the population level(14).

10 The applicability of INTERSALT for estimating intake of salt was reported from different  
11 Western and Asian countries (30). It was shown that INTERSALT could be useful for estimating  
12 intake of salt by spot urine in the Asian population (12). In our study, the difference between  
13 estimated and measured sodium using INTERSALT (19) method was insignificant but the  
14 correlation analysis did not show any agreement, therefore, we do not support this notion. On the  
15 other hand, both Kawasaki and Tanaka methods had a significant difference between the means  
16 of estimated and measured 24 hour sodium. The correlation analysis also showed disagreement  
17 between estimated and measured 24 hour sodium excretion for both methods. Our study findings  
18 are consistent to previous reports indicating that probably these methods could not be used for all  
19 populations and there is need to make local equations(14, 39).

20 The value of creatinine concentration in a spot urine sample is important in predicting daily salt  
21 intake. Creatinine is produced during metabolization of creatinine phosphate in muscles. Hence  
22 its excretion in urine is dependent on body mass and protein intake. Similarly, creatinine  
23 excretion also varies among individuals depending on gender, age groups and other demogaphic  
24 features. The sodium to creatinine ratio might not depend on differnce at population level as  
25 there is low protein intake in developing countries (40) Also, Kawasaki and Tanaka's methods  
26 derived using data of the Japanese population might not truly representing our population.

27 In summary, our study showed that salt intake (daily) is high though the people were aware of its  
28 impact on their health. The analysis also showed that the three methods i.e. Tanaka, Kawasaki  
29 and INTERSALT for 24 hour estimation are not applicable for Pakistani population. Our study  
30 provided a base for conducting large scale studies to formulate accurate equation for estimation



1 of daily salt intake for local population. Besides this, interventional studies are also required for  
2 evaluating the possible interventions for behavior change in the population.

3 Our study has potential limitations like having less samples, lack of diversity with respect to  
4 ethnicity but still provides the valuable information regarding the validity of three methods for  
5 the estimating salt intake.

### 6 **Conclusion:**

7 Daily intake of salt was high than recommended by the WHO. Findings showed that none of the  
8 three methods could be used for estimating daily intake of salt in local settings of Pakistan.

### 9 **Acknowledgments:**

10 We are thankful to the Excel labs staff for their dedication to test the samples timely especially  
11 Mr. Abdul Waheed, Manager Operations for his continuous support through the project. We are  
12 also obliged to all participants who voluntarily provided samples especially 24 hour urine  
13 sample. We are highly thankful to Mr. Saeed Ahmed Shahid for coordinating with the  
14 participants for collection of samples.

15

### 16 **References:**

- 17 1. Strazzullo P, D'Elia L, Kandala NB, Cappuccio FP. Salt intake, stroke, and  
18 cardiovascular disease: meta-analysis of prospective studies. *Bmj*. 2009;339:b4567.
- 19 2. Guilbert JJ. The world health report 2002 - reducing risks, promoting healthy life.  
20 *Education for health*. 2003;16(2):230.
- 21 3. Shin JY, Kim J, Choi KS, Suh M, Park B, Jun JK. Relationship between Salt Preference  
22 and Gastric Cancer Screening: An Analysis of a Nationwide Survey in Korea. *Cancer research*  
23 *and treatment : official journal of Korean Cancer Association*. 2016;48(3):1037-44.
- 24 4. Dotsch-Klerk M, Goossens WP, Meijer GW, van het Hof KH. Reducing salt in food;  
25 setting product-specific criteria aiming at a salt intake of 5 g per day. *European journal of*  
26 *clinical nutrition*. 2015;69(7):799-804.
- 27 5. Suckling RJ, Swift PA. The health impacts of dietary sodium and a low-salt diet. *Clinical*  
28 *medicine*. 2015;15(6):585-8.

- 1 6. Neal B, YW, Li N. . The Effectiveness and Costs of Population Interventions to Reduce  
2 Salt Consumption. World Health Organization; Geneva, Switerland. 2007.
- 3 7. Webster J, Trieu K, Dunford E, Hawkes C. Target salt 2025: a global overview of  
4 national programs to encourage the food industry to reduce salt in foods. *Nutrients*.  
5 2014;6(8):3274-87.
- 6 8. McLean RM. Measuring population sodium intake: a review of methods. *Nutrients*.  
7 2014;6(11):4651-62.
- 8 9. Johansson G, Bingham S, Vahter M. A method to compensate for incomplete 24-hour  
9 urine collections in nutritional epidemiology studies. *Public health nutrition*. 1999;2(4):587-91.
- 10 10. Tanaka T, Okamura T, Miura K, Kadowaki T, Ueshima H, Nakagawa H, et al. A simple  
11 method to estimate populational 24-h urinary sodium and potassium excretion using a casual  
12 urine specimen. *J Hum Hypertens*. 2002;16(2):97-103.
- 13 11. Ji C, Dary O, Campbell NR, Cappuccio FP, Sub-group for R, Surveillance of  
14 PWHOREGfCDPw-wDSR. Spot and overnight urine are inappropriate to assess population  
15 sodium intake. *Revista panamericana de salud publica = Pan American journal of public health*.  
16 2013;34(4):283.
- 17 12. Whitton C, Gay GM, Lim RB, Tan LW, Lim WY, van Dam RM. Evaluation of  
18 Equations for Predicting 24-Hour Urinary Sodium Excretion from Casual Urine Samples in  
19 Asian Adults. *The Journal of nutrition*. 2016;146(8):1609-15.
- 20 13. McLean R, Williams S, Mann J. Monitoring population sodium intake using spot urine  
21 samples: validation in a New Zealand population. *Journal of human hypertension*.  
22 2014;28(11):657-62.
- 23 14. Peng Y, Li W, Wang Y, Chen H, Bo J, Wang X, et al. Validation and Assessment of  
24 Three Methods to Estimate 24-h Urinary Sodium Excretion from Spot Urine Samples in Chinese  
25 Adults. *PloS one*. 2016;11(2):e0149655.
- 26 15. Kawasaki T, Itoh K, Uezono K, Sasaki H. A simple method for estimating 24 h urinary  
27 sodium and potassium excretion from second morning voiding urine specimen in adults. *Clinical  
28 and experimental pharmacology & physiology*. 1993;20(1):7-14.
- 29 16. Morris MC, Brockman J, Schneider JA, Wang Y, Bennett DA, Tangney CC, et al.  
30 Association of Seafood Consumption, Brain Mercury Level, and APOE epsilon4 Status With  
31 Brain Neuropathology in Older Adults. *Jama*. 2016;315(5):489-97.

- 1 17. Rafique I, Saqib MAN, Munir MA, Qureshi H, Rizwanullah, Khan SA, et al. Prevalence  
2 of risk factors for noncommunicable diseases in adults: key findings from the Pakistan STEPS  
3 survey. *Eastern Mediterranean health journal = La revue de sante de la Mediterranee orientale =*  
4 *al-Majallah al-sihhiyah li-sharq al-mutawassit*. 2018;24(1):33-41.
- 5 18. Tukey JW. *Exploratory Data Analysis*. Reading, Massachusetts:: Addison-Wesley.; 1977.
- 6 19. Brown IJ, Dyer AR, Chan Q, Cogswell ME, Ueshima H, Stamler J, et al. Estimating 24-  
7 hour urinary sodium excretion from casual urinary sodium concentrations in Western  
8 populations: the INTERSALT study. *American journal of epidemiology*. 2013;177(11):1180-92.
- 9 20. Mills KT, Bundy JD, Kelly TN, Reed JE, Kearney PM, Reynolds K, et al. Global  
10 Disparities of Hypertension Prevalence and Control: A Systematic Analysis of Population-Based  
11 Studies From 90 Countries. *Circulation*. 2016;134(6):441-50.
- 12 21. Batcagan-Abueg AP, Lee JJ, Chan P, Rebello SA, Amarra MS. Salt intakes and salt  
13 reduction initiatives in Southeast Asia: a review. *Asia Pacific journal of clinical nutrition*.  
14 2013;22(4):490-504.
- 15 22. Johnson C, Praveen D, Pope A, Raj TS, Pillai RN, Land MA, et al. Mean population salt  
16 consumption in India: a systematic review. *Journal of hypertension*. 2017;35(1):3-9.
- 17 23. Zaman MM, Choudhury SR, Ahmed J, Khandaker RK, Rouf MA, Malik A. Salt Intake in  
18 an Adult Population of Bangladesh. *Global heart*. 2016.
- 19 24. Xu J, Wang M, Chen Y, Zhen B, Li J, Luan W, et al. Estimation of salt intake by 24-hour  
20 urinary sodium excretion: a cross-sectional study in Yantai, China. *BMC public health*.  
21 2014;14:136.
- 22 25. Land MA, Webster J, Christoforou A, Praveen D, Jeffery P, Chalmers J, et al. Salt intake  
23 assessed by 24 h urinary sodium excretion in a random and opportunistic sample in Australia.  
24 *BMJ open*. 2014;4(1):e003720.
- 25 26. Amarra MS, Khor GL. Sodium Consumption in Southeast Asia: An Updated Review of  
26 Intake Levels and Dietary Sources in Six Countries. *Preventive Nutrition: Springer*; 2015. p.  
27 765-92.
- 28 27. Brown IJ, Tzoulaki I, Candeias V, Elliott P. Salt intakes around the world: implications  
29 for public health. *International journal of epidemiology*. 2009;38(3):791-813.
- 30 28. Hoffmann IS, Cubeddu LX. Salt and the metabolic syndrome. *Nutrition, metabolism, and*  
31 *cardiovascular diseases : NMCD*. 2009;19(2):123-8.

- 1 29. Zhang JY, Yan LX, Tang JL, Ma JX, Guo XL, Zhao WH, et al. Estimating daily salt  
2 intake based on 24 h urinary sodium excretion in adults aged 18-69 years in Shandong, China.  
3 *BMJ Open*. 2014;4(7):e005089.
- 4 30. McLaren L, Sumar N, Barberio AM, Trieu K, Lorenzetti DL, Tarasuk V, et al.  
5 Population-level interventions in government jurisdictions for dietary sodium reduction. The  
6 *Cochrane database of systematic reviews*. 2016;9:CD010166.
- 7 31. Country Cooperation Strategy. Health Situation. Pakistan. World Health Organization  
8 2018 [22-10-2018]. Available from:  
9 [http://apps.who.int/iris/bitstream/handle/10665/136607/ccsbrief\\_pak\\_en.pdf;jsessionid=5D5AC8](http://apps.who.int/iris/bitstream/handle/10665/136607/ccsbrief_pak_en.pdf;jsessionid=5D5AC8B53D20CBAE87E22FA486E62662?sequence=1)  
10 [B53D20CBAE87E22FA486E62662?sequence=1](http://apps.who.int/iris/bitstream/handle/10665/136607/ccsbrief_pak_en.pdf;jsessionid=5D5AC8B53D20CBAE87E22FA486E62662?sequence=1).
- 11 32. Saqib MAN, Rafique I, Qureshi H, Munir MA, Bashir R, Arif BW, et al. Burden of  
12 Tobacco in Pakistan: Findings From Global Adult Tobacco Survey 2014. *Nicotine & tobacco*  
13 *research : official journal of the Society for Research on Nicotine and Tobacco*.  
14 2018;20(9):1138-43.
- 15 33. Shera AS, Basit A, Fawwad A, Hakeem R, Ahmedani MY, Hydrie MZ, et al. Pakistan  
16 National Diabetes Survey: prevalence of glucose intolerance and associated factors in the Punjab  
17 Province of Pakistan. *Primary care diabetes*. 2010;4(2):79-83.
- 18 34. Shera AS, Rafique G, Khwaja IA, Ara J, Baqai S, King H. Pakistan national diabetes  
19 survey: prevalence of glucose intolerance and associated factors in Shikarpur, Sindh Province.  
20 *Diabetic medicine : a journal of the British Diabetic Association*. 1995;12(12):1116-21.
- 21 35. Shera AS, Rafique G, Khawaja IA, Baqai S, King H. Pakistan National Diabetes Survey:  
22 prevalence of glucose intolerance and associated factors in Baluchistan province. *Diabetes*  
23 *research and clinical practice*. 1999;44(1):49-58.
- 24 36. Chronic diseases. National Health Survey of Pakistan; 1990-94. Health profile of peoples  
25 of Pakistan. Pakistan Medical Research Council, 1998. Report No.
- 26 37. Slavin J. Fiber and prebiotics: mechanisms and health benefits. *Nutrients*.  
27 2013;5(4):1417-35.
- 28 38. Rhee MY, Kim JH, Shin SJ, Gu N, Nah DY, Hong KS, et al. Estimation of 24-hour  
29 urinary sodium excretion using spot urine samples. *Nutrients*. 2014;6(6):2360-75.
- 30 39. Ma W, Yin X, Zhang R, Liu F, Yang D, Fan Y, et al. Validation and Assessment of  
31 Three Methods to Estimate 24-h Urinary Sodium Excretion from Spot Urine Samples in High-

1 Risk Elder Patients of Stroke from the Rural Areas of Shaanxi Province. International journal of  
 2 environmental research and public health. 2017;14(10).

3 40. Bourdoux P. Evaluation of the iodine intake: problems of the iodine/creatinine ratio--  
 4 comparison with iodine excretion and daily fluctuations of iodine concentration. Experimental  
 5 and clinical endocrinology & diabetes : official journal, German Society of Endocrinology [and]  
 6 German Diabetes Association. 1998;106 Suppl 3:S17-20.

7 **Tables:**

8 Table1. Equations of three methods used to stimated24-hours urinary sodium excretion using  
 9 spot urine.

| <b>Method</b>    | <b>Urine Sample</b>         | <b>Formula to Estimate 24-h urinary sodium excretion (mg/day)</b>                                                                                                                                                                                                                                                                                                                |
|------------------|-----------------------------|----------------------------------------------------------------------------------------------------------------------------------------------------------------------------------------------------------------------------------------------------------------------------------------------------------------------------------------------------------------------------------|
| <b>INTERSALT</b> | <b>Casual Spot Urine</b>    | $23 \times ((25.46 + 0.46 \times \text{Naspot}) - 2.75 \times \text{Crspot} - 0.13 \times \text{Kspot} + 4.10 \times \text{BMI} + 0.26 \times \text{Age})$ <b>(Male)</b><br>$23 \times ((5.07 + 0.34 \times \text{Naspot}) - 2.16 \times \text{Crspot} - 0.09 \times \text{Kspot} + 2.39 \times \text{BMI} + 2.35 \times \text{Age} - 0.03 \times \text{Age}^2)$ <b>(Female)</b> |
| <b>Tanaka</b>    | <b>Casual Spot Urine</b>    | $23 \times 21.98 \times (\text{Na spot} / \text{Crspot} \times \text{PrUCr24h})^{0.392}$ PrUCr24h =<br>$14.89 \times \text{Weight} + 16.14 \times \text{Height} - 2.04 \times \text{Age} - 2244.45$                                                                                                                                                                              |
| <b>Kawasaki</b>  | <b>Second morning urine</b> | $23 \times 16.3 \times (\text{Na spot} / \text{Crspot} \times \text{PrUCr24h})^{0.5}$<br>PrUCr24h = $15.12 \times \text{Weight} + 7.39 \times \text{Height} - 12.63 \times \text{Age} - 79.9$ <b>(Male)</b><br>PrUCr24h = $8.58 \times \text{Weight} + 5.09 \times \text{Height} - 4.72 \times \text{Age} - 74.95$ <b>(Female)</b>                                               |

10  
 11

1 **Table 2: Demographic Characteristics and Mean Levels Analytes**

| <b>Description</b>        | <b>Male<br/>(n=92)</b> | <b>Female<br/>(n=28)</b> | <b>Total<br/>(n=106)</b> | <b>p-Value</b> |
|---------------------------|------------------------|--------------------------|--------------------------|----------------|
| <b>Demography</b>         |                        |                          |                          |                |
| Age(years)                | 39(±11.0)              | 39(±12.0)                | 39(±11.0)                | 0.955          |
| Height(Feet)              | 5.48(±0.39)            | 5.46(±0.31)              | 5.48(±0.37)              | 0.749          |
| Weight(Kg)                | 74.84(±14.30)          | 71.25(±16.74)            | 74(±14.91)               | 0.311          |
| BMI(kg/m <sup>2</sup> )   | 26.6(±5.2)             | 26.6(±5.0)               | 26.6(±5.1)               | 0.946          |
| <b>Spot Urine</b>         |                        |                          |                          |                |
| Urine Creatinine(mmol/L)  | 171(±104)              | 133(±89.0)               | 165(±102.0)              | 0.139          |
| Spot Sodium (mmol/L)      | 140(±64)               | 115(±62.0)               | 134(±64.0)               | 0.081          |
| Spot Potassium (mmol/L)   | 53.8(±33.6)            | 51.6(±21.5)              | 53.3(±33.3)              | 0.693          |
| Spot Chloride (mmol/L)    | 171(±78)               | 132(±79.0)               | 162±(79.0)               | 0.027          |
| <b>24 h Urine</b>         |                        |                          |                          |                |
| Urine Creatinine (mmol/L) | 117.02(±58.4)          | 102.39(±80.35)           | 113.80(±63.78)           | 0.393          |
| 24 hrs Sodium (mmol/L)    | 158(±78)               | 112(±60.0)               | 148±(76.0)               | 0.002          |
| 24 hrs Potassium (mmol/L) | 40(±17)                | 46(±38.0)                | 41±(23.0)                | 0.421          |
| 24 hrs Chloride (mmol/L)  | 148(±72)               | 116(±71.0)               | 141±(73.0)               | 0.045          |

2

3

1 **Table3: Association of discretionary salt with different risk factors**

| Description                                       | B      | S.E.  | P-Value | OR<br>95% CI           |
|---------------------------------------------------|--------|-------|---------|------------------------|
| Age                                               | -0.021 | 0.023 | 0.374   | 2.04(0.63 - 6.65)      |
| Gender Male                                       | 1.52   | 0.53  | 0.004   | 5.31<br>(1.88 - 15.02) |
| BMI                                               | 0.187  | 0.592 | 0.752   | 1.66<br>(0.58 - 4.74)  |
| Adding Salt during Cooking                        | -3.301 | 0.771 | <0.001  | 0.97<br>(0.94 - 1.00)  |
| Adding Salt during Dinning                        | -0.29  | 0.529 | 0.584   | 0.66<br>(0.25 - 1.73)  |
| Eaten salty food from restaurant,                 | -0.126 | 0.632 | 0.842   | 1.46<br>(0.48 - 4.41)  |
| Knowledge about the impact of high salt on health | -0.788 | 0.515 | 0.126   | 0.487<br>(0.150-1.578) |

2  
3  
4  
5  
6

**Table 4: Comparison of measured (24 h) and estimated sodium**

| Description                 | Mean Difference | Stand Error | Concordance Correlation Coefficient | Intraclass Correlation Coefficient |
|-----------------------------|-----------------|-------------|-------------------------------------|------------------------------------|
| <b>Measured Na</b> (mmol/L) | Reference       | Reference   | Reference                           | Reference                          |
| <b>Intersalt</b> (mmol/L)   | -19.64          | 11.65       | -0.79(-0.84 to -0.69)               | -0.63(-0.74 to -0.50)              |
| <b>Tanaka</b> (mmol/L)      | 167.35*         | 12.31       | -0.37(-0.53 to -0.19)               | -0.33(-0.49 to -0.15)              |
| <b>Kawasaki</b> (mmol/L)    | -42.49*         | 11.16       | -0.79(-0.85 to -0.70)               | -0.67(-0.76 to -0.55)              |

\*p. <0.05

7  
8

9 Figure 1: Scatter plot of measured 24 h urine sodium versus the estimated using Tanka (A),  
10 Kawasaki (B) and INTERSALT (C) methods. The black line is representing linear regression  
11 line while red dash lines are showing 95% predicted mean.

12 Figure 2: Bland Altman plot of measured 24-h urine sodium excretion versus INTERSALT (A),  
13 Kawasaki (B) and Tanaka (C) method estimated 24-h (mmol/L).The difference between  
14 measured and estimated was all estimated values minus the measured values. The mid red line is



1 representing the mean difference or bias between measured and estimated values while the  
2 dashed line represents 95% limits of agreement of the mean difference ( $\pm 1.96SD$ )

3

4

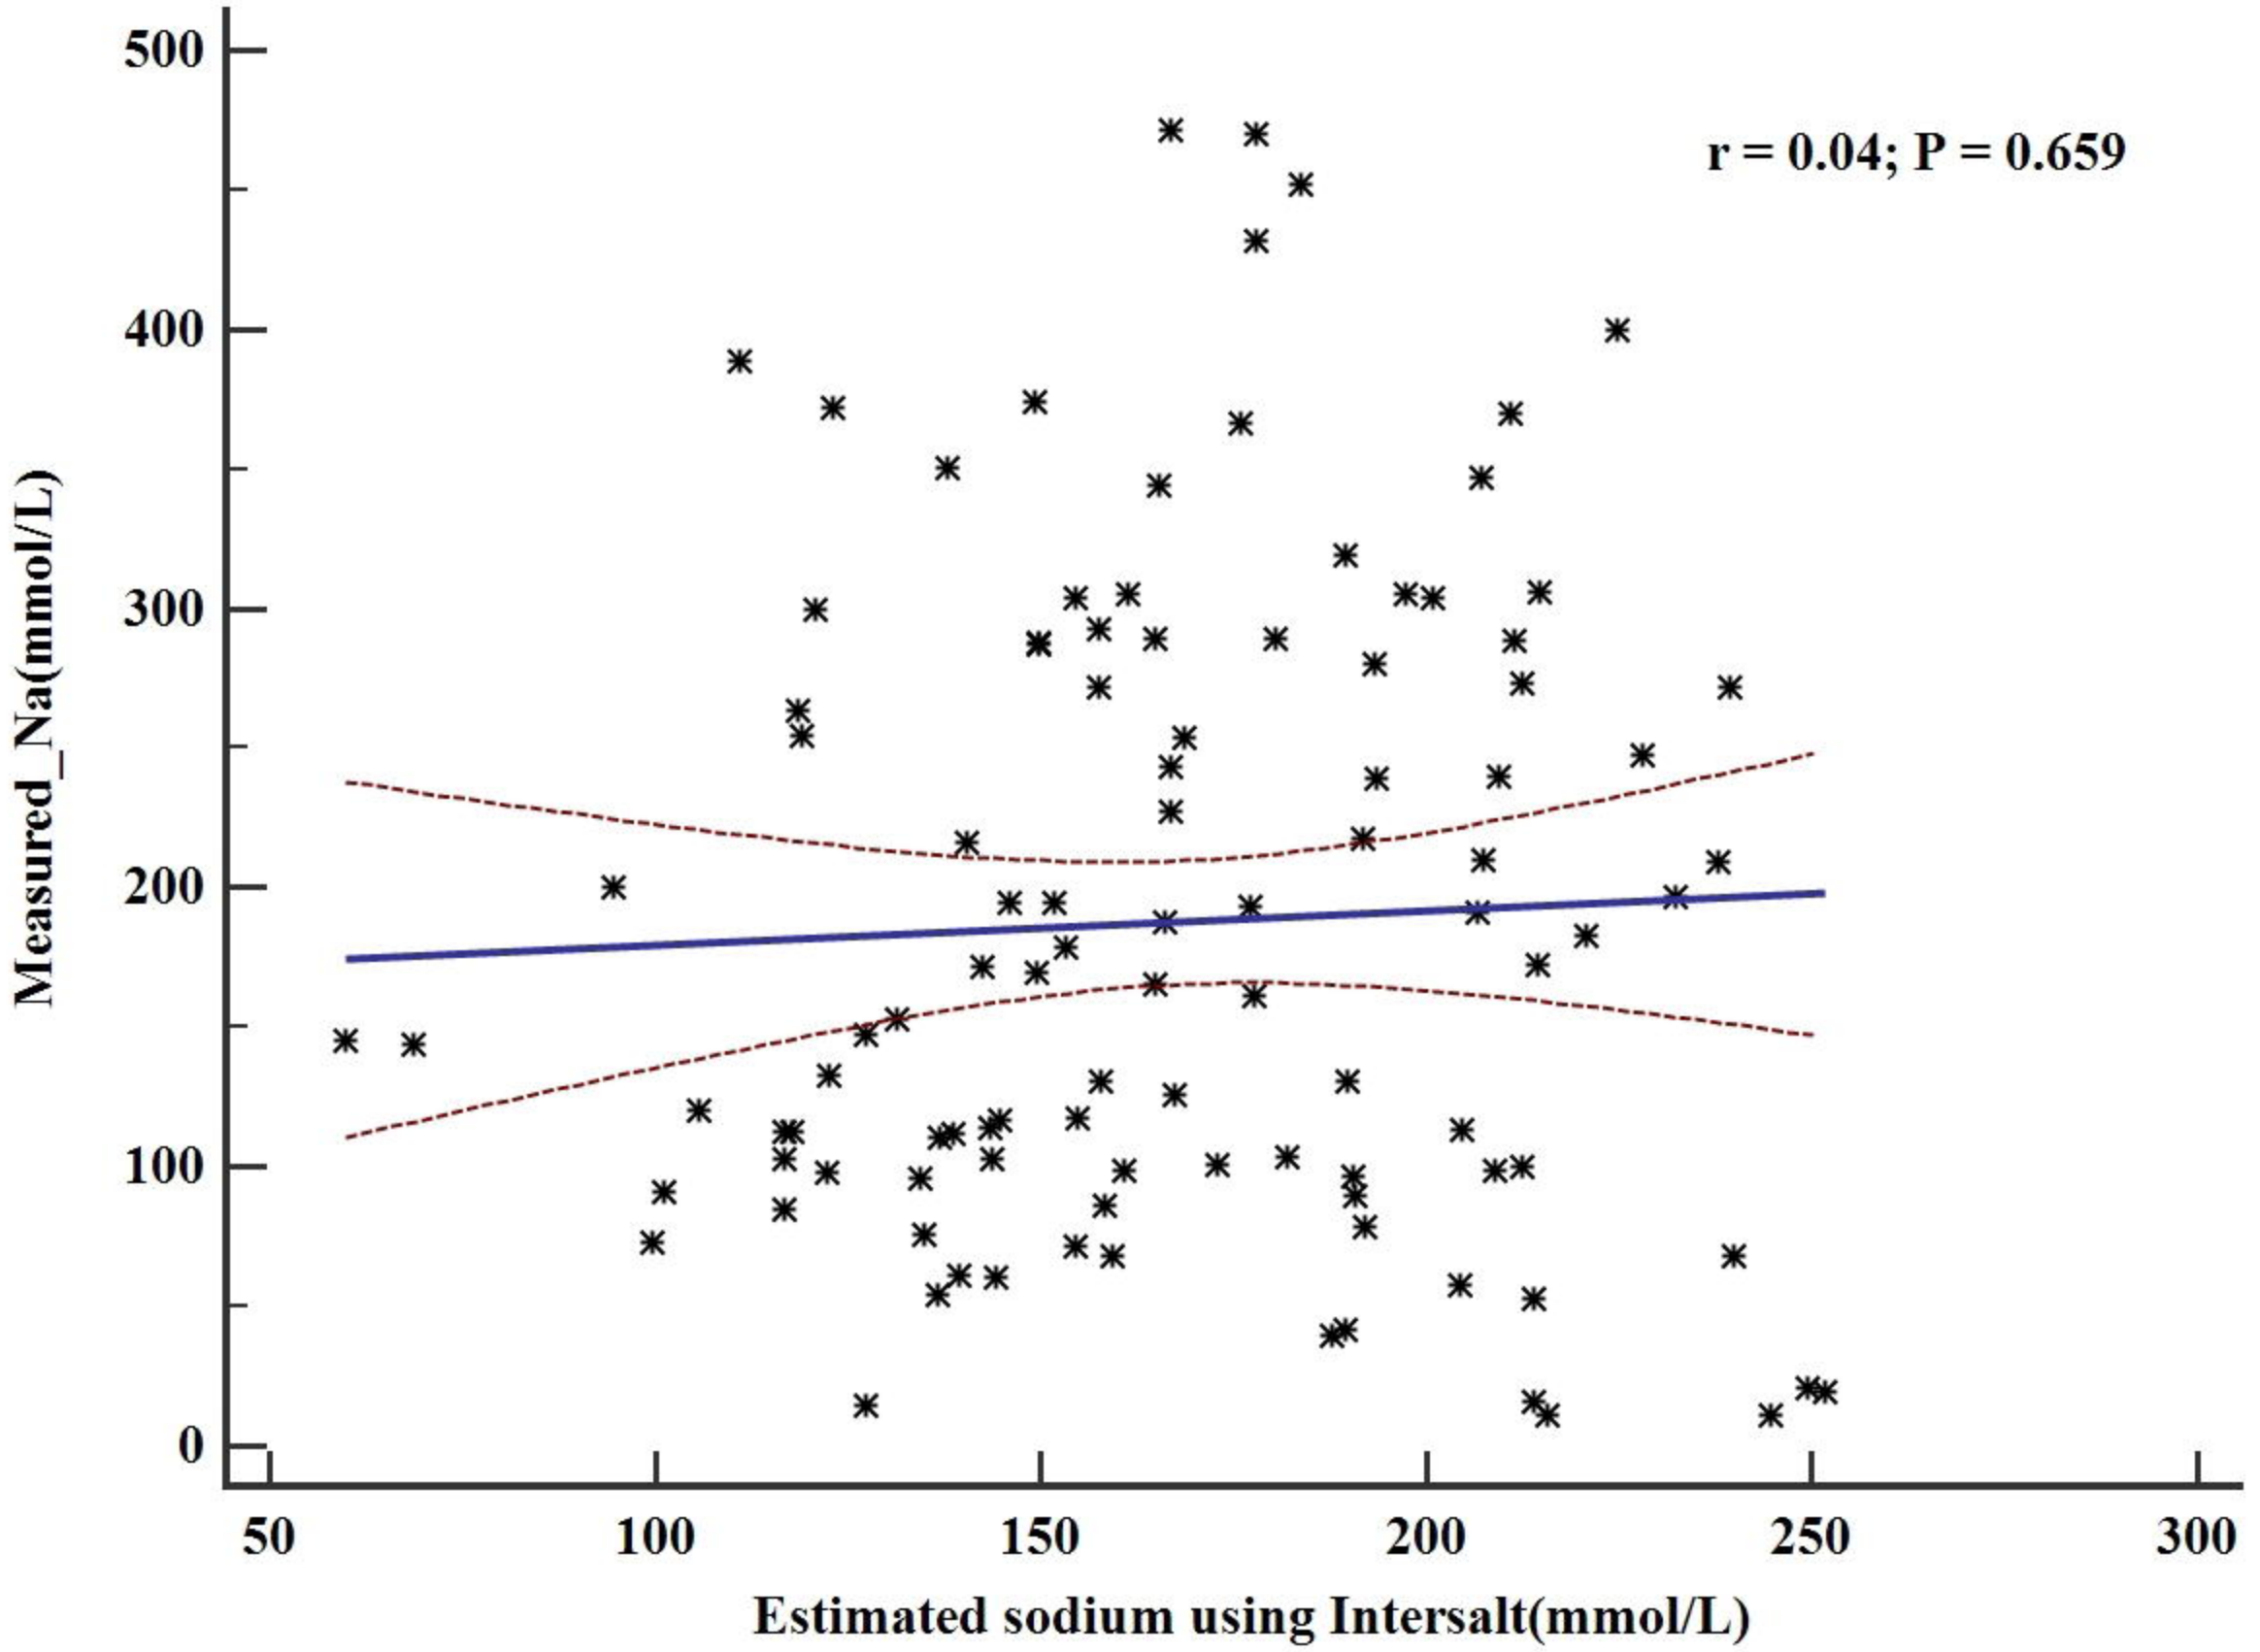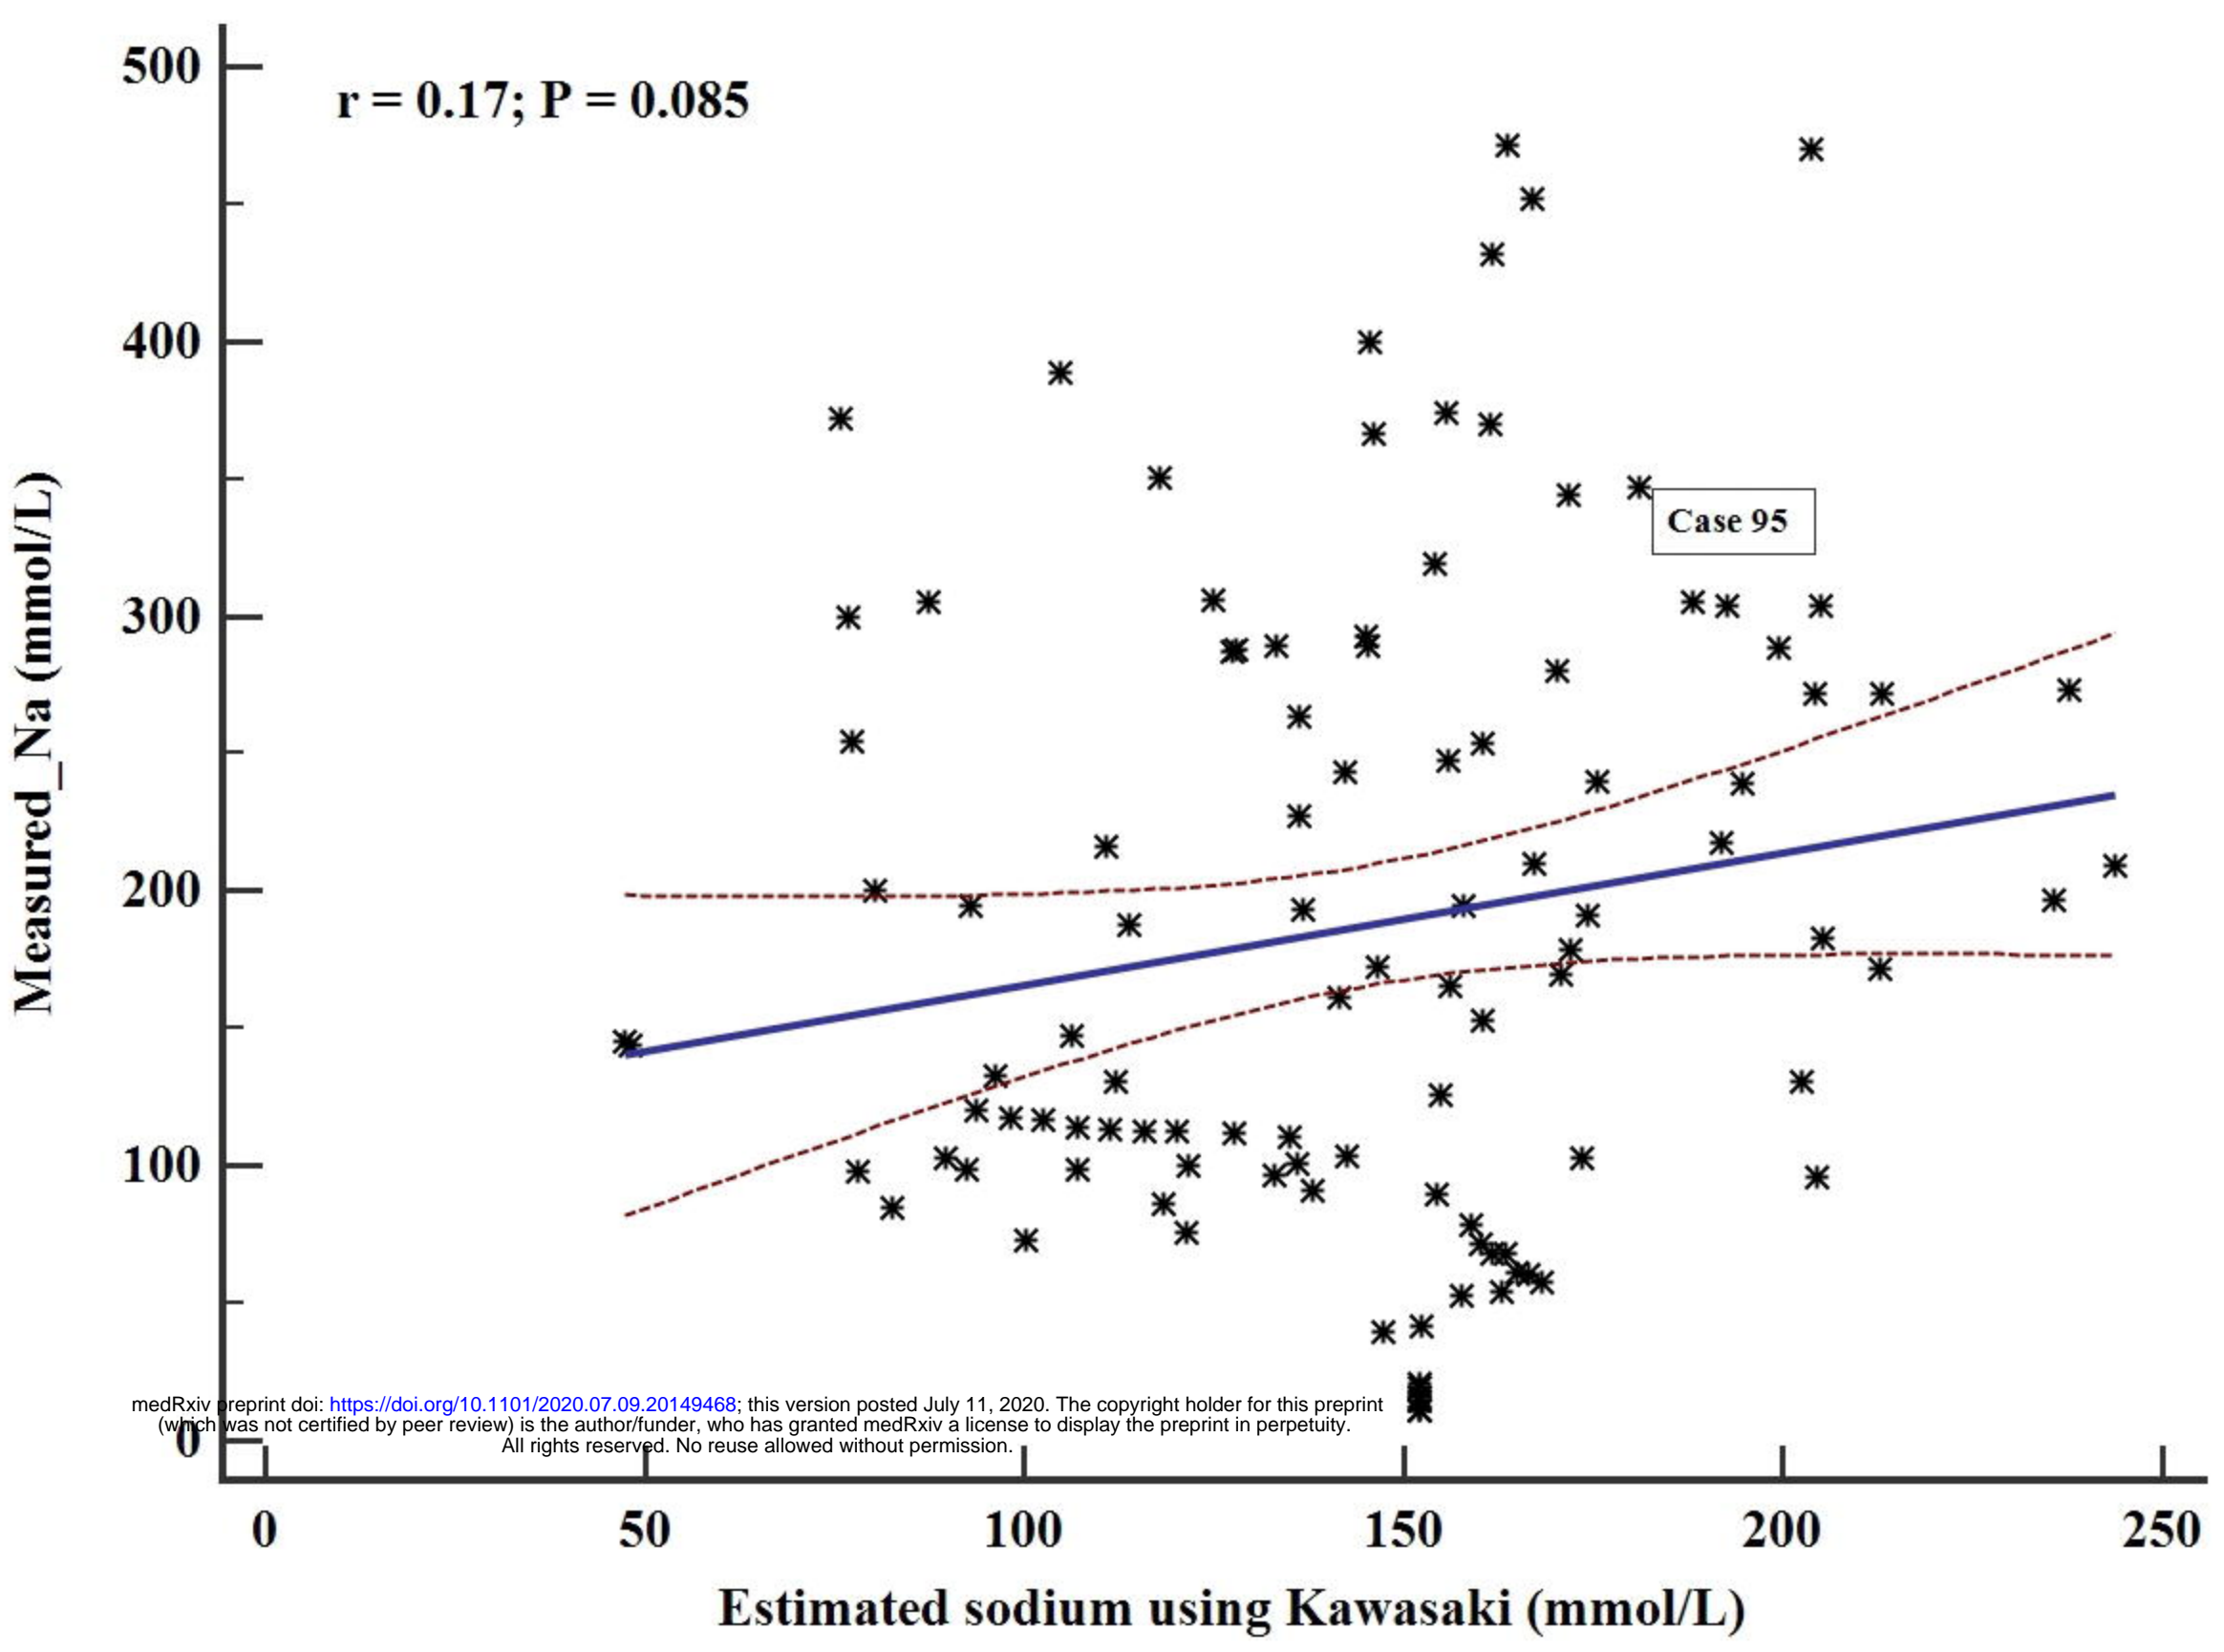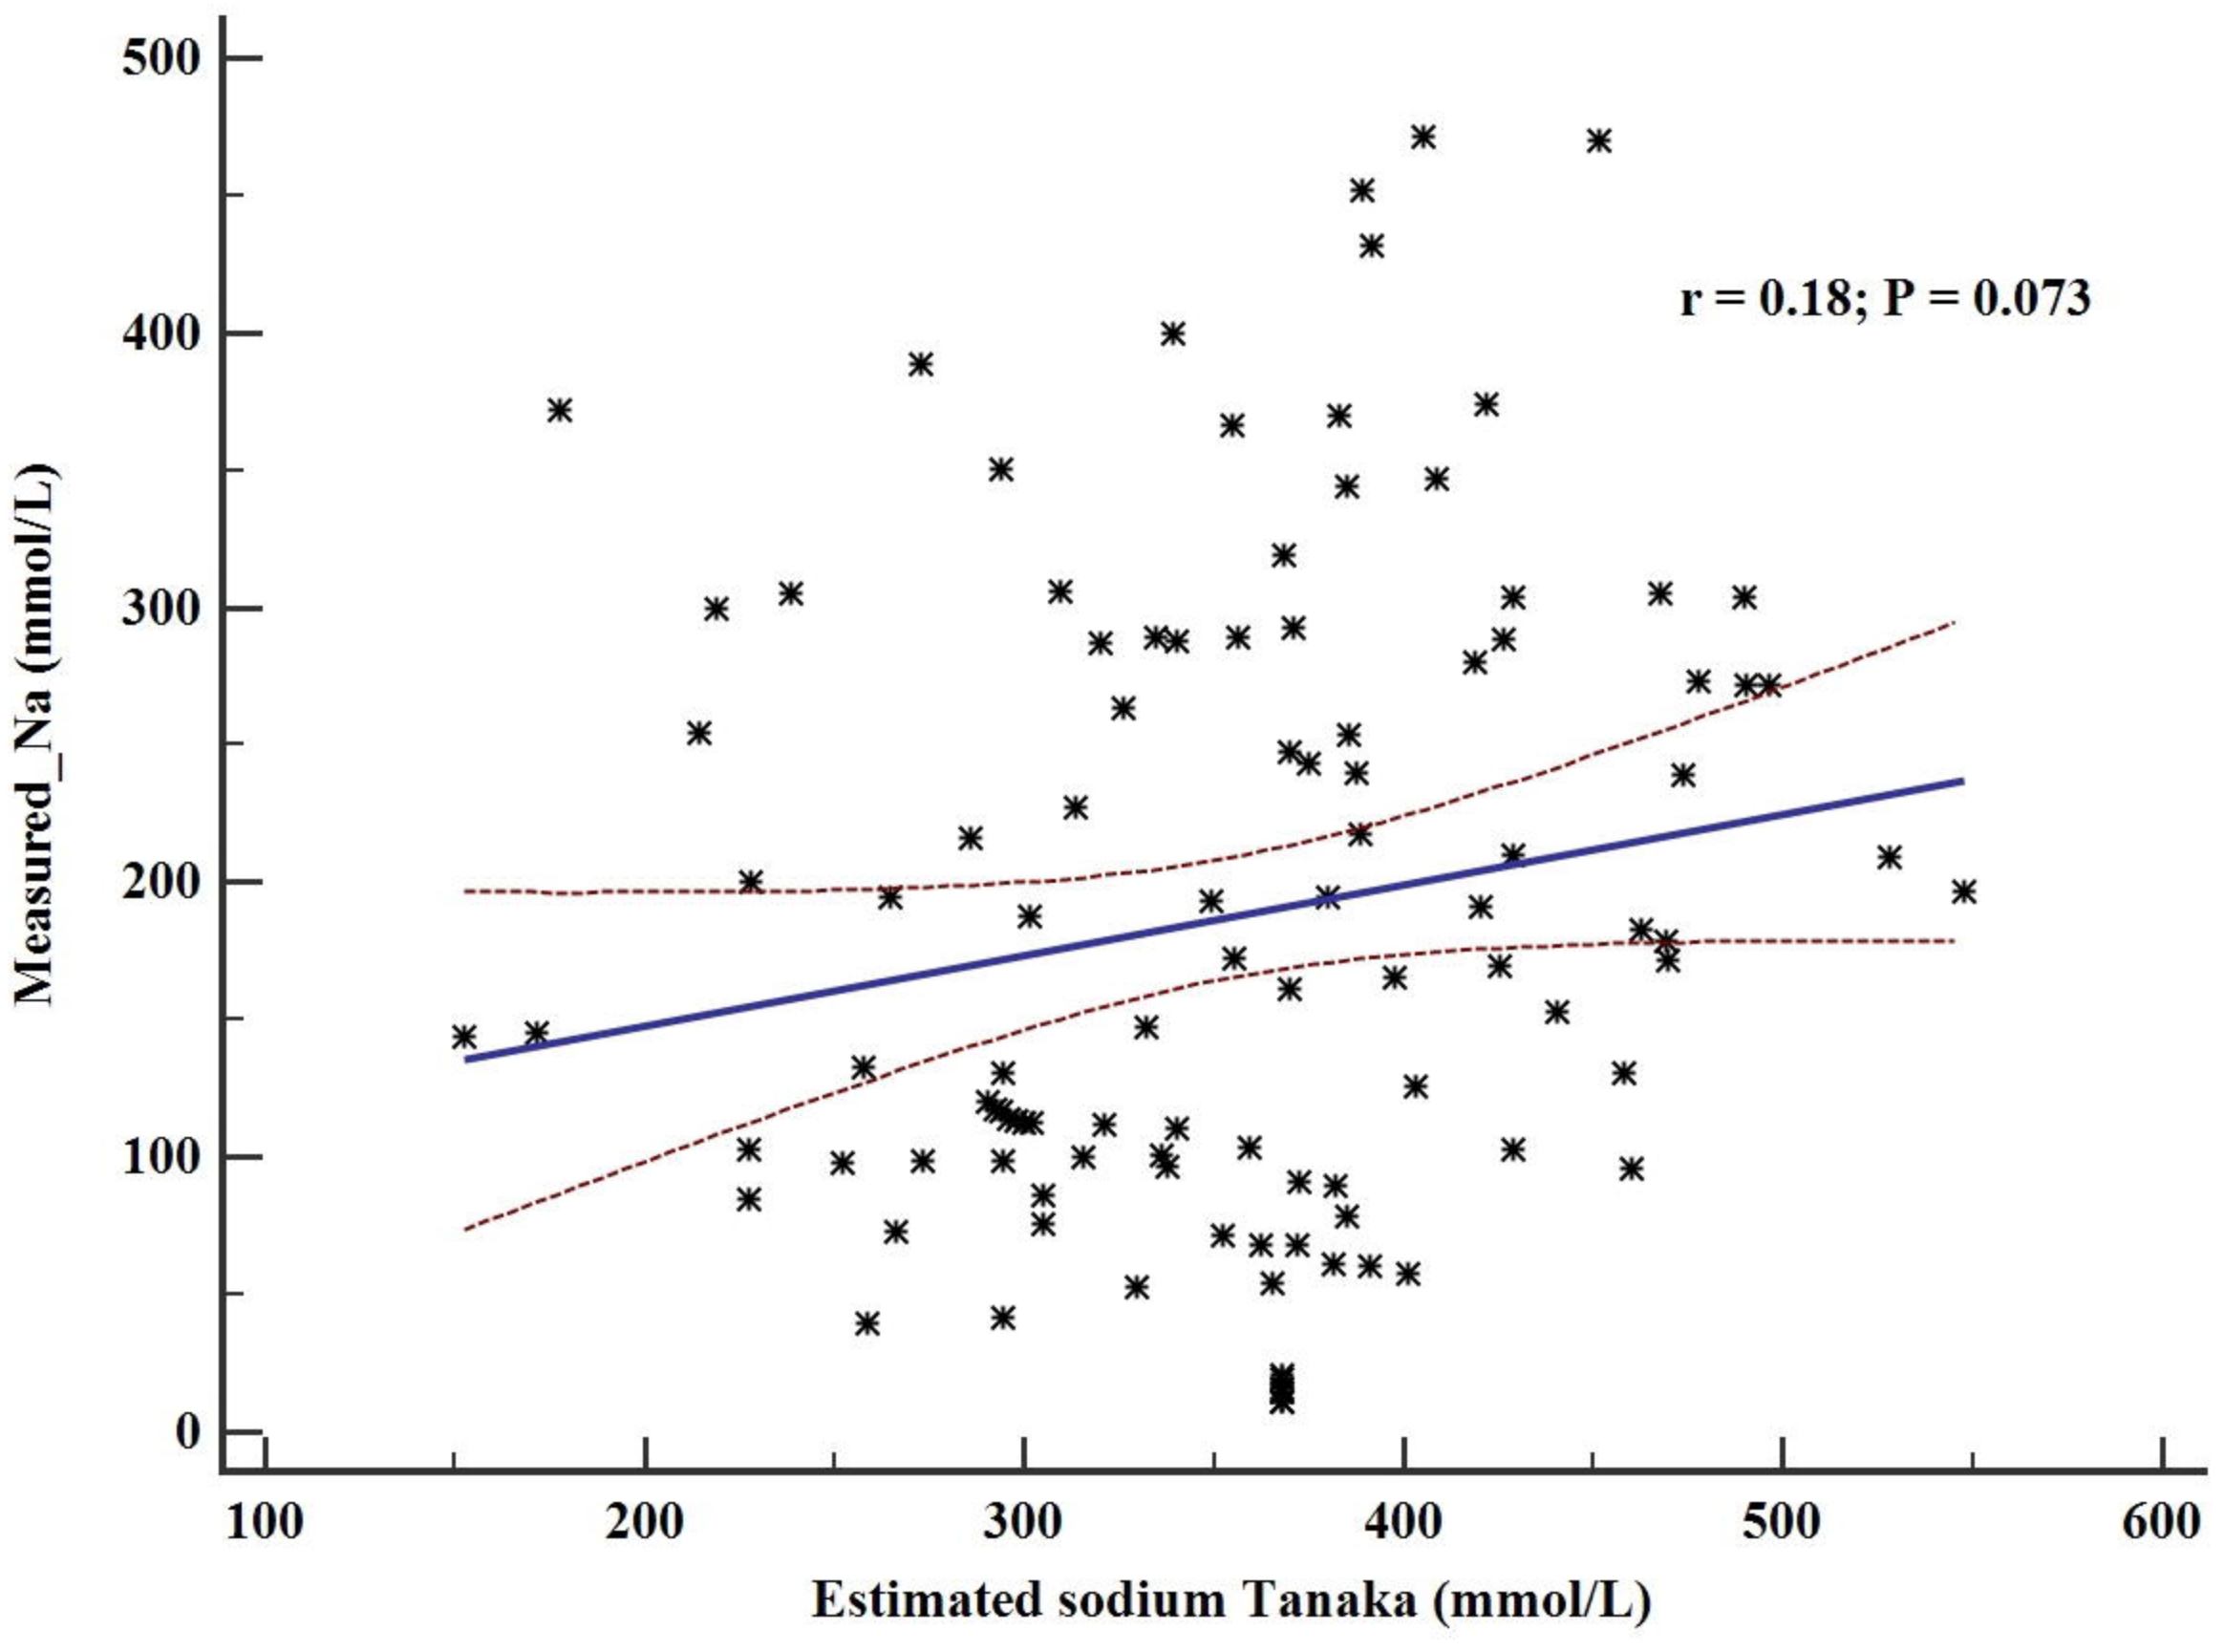

**A**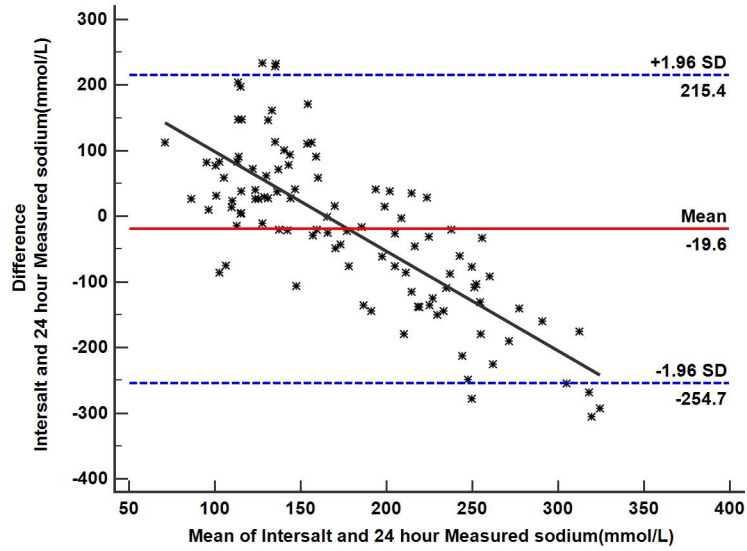**B**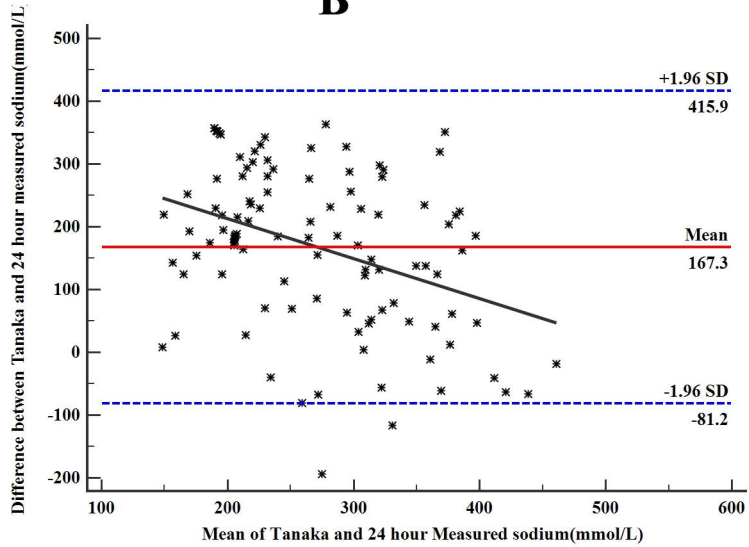**C**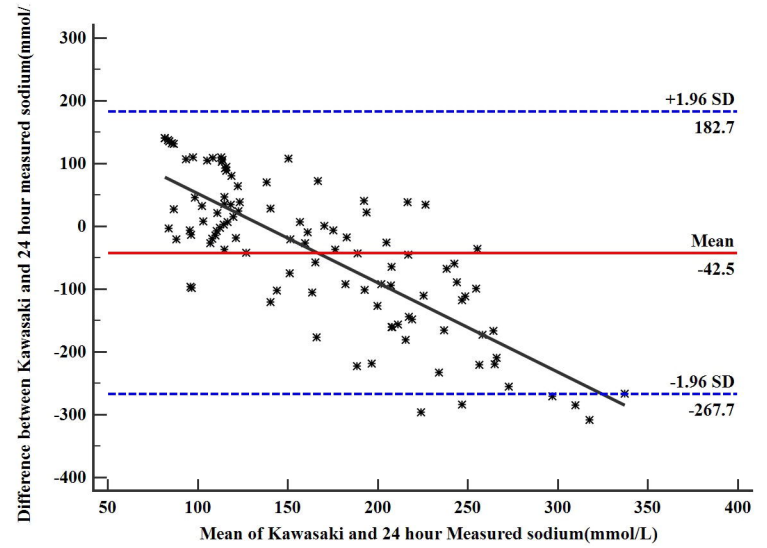

Source: https://www.medrxiv.org/content/medrxiv/early/2020/07/11/2020.07.09.20149468.full.pdf
